# Supplementary material
Source: HighWire-hosted journal article supplement (https://stke.sciencemag.org/content/suppl/2009/02/13/2.58.ra6)
Supplement: 2000021_SM.pdf [file 2000021_SM.pdf]

Supplementary Materials for

**The Precise Sequence of FGF Receptor Autophosphorylation Is Kinetically Driven and Is Disrupted by Oncogenic Mutations**

Erin D. Lew, Cristina M. Furdui, Karen S. Anderson, Joseph Schlessinger\*

\*To whom correspondence should be addressed. E-mail: joseph.schlessinger@yale.edu

Published 17 February 2009, *Sci. Signal.* **2**, ra6 (2009)

DOI: 10.1126/scisignal.2000021

**This PDF file includes:**

Fig. S1. Identification of tyrosine phosphorylation sites on kinase-dead mutants with ESI-MS and MS/MS.

Fig. S2. Identification of tyrosine phosphorylation sites of N546K glioblastoma with ESI-MS and MS/MS.

Fig. S3. Determination of  $K_m$  for FGFR1-mediated substrate phosphorylation.

Fig. S4. 3T3 cells stably expressing wild-type or mutant FGFR1.

Table S1. Comparison of autophosphorylation kinetics of FGFR1 kinase (WT) and FGFR1 kinase mutant implicated in glioblastoma, N546K.

## Supplementary Materials

**Figure S1. Identification of Tyrosine Phosphorylation Sites on Kinase-Dead Mutants with ESI-MS and MS/MS.** Each of the kinase-dead samples analyzed by native-PAGE was subjected to in gel trypsin digestion. The resulting tryptic digest for each phosphorylation state was further analyzed by nano-LC (Dionex Ultimate3000 System) coupled to a Thermo ESI LTQ mass spectrometer. A typical gradient was run for 60 min from 0 to 100% solvent B (80% acetonitrile, 20% H<sub>2</sub>O and 0.1% formic acid). Solvent A consisted of 5% acetonitrile, 95% H<sub>2</sub>O and 0.1% formic acid. The flow rate was set at 200 nL/min on a 75 μm x 10 cm fused silica capillary column (New Objectives) in-house packed with Michrom Magic C18AQ (200 Å, 5 μm). The ESI LTQ mass spectrometer was operated in selected ion monitoring mode (SIM) for precursor ions corresponding to the peptides containing unphosphorylated and phosphorylated tyrosine residues. The peptide identification was performed automatically using the Bioworks 3.1 software. The generated peptide list was ranked by XCorr to charge state ratio and the phosphorylation sites were identified for each phosphorylation state. Representative MS/MS spectra for the phosphorylated **(A)** Y<sup>583</sup>KD and **(B)** Y<sup>654</sup>KD are shown.

Figure S1

A.

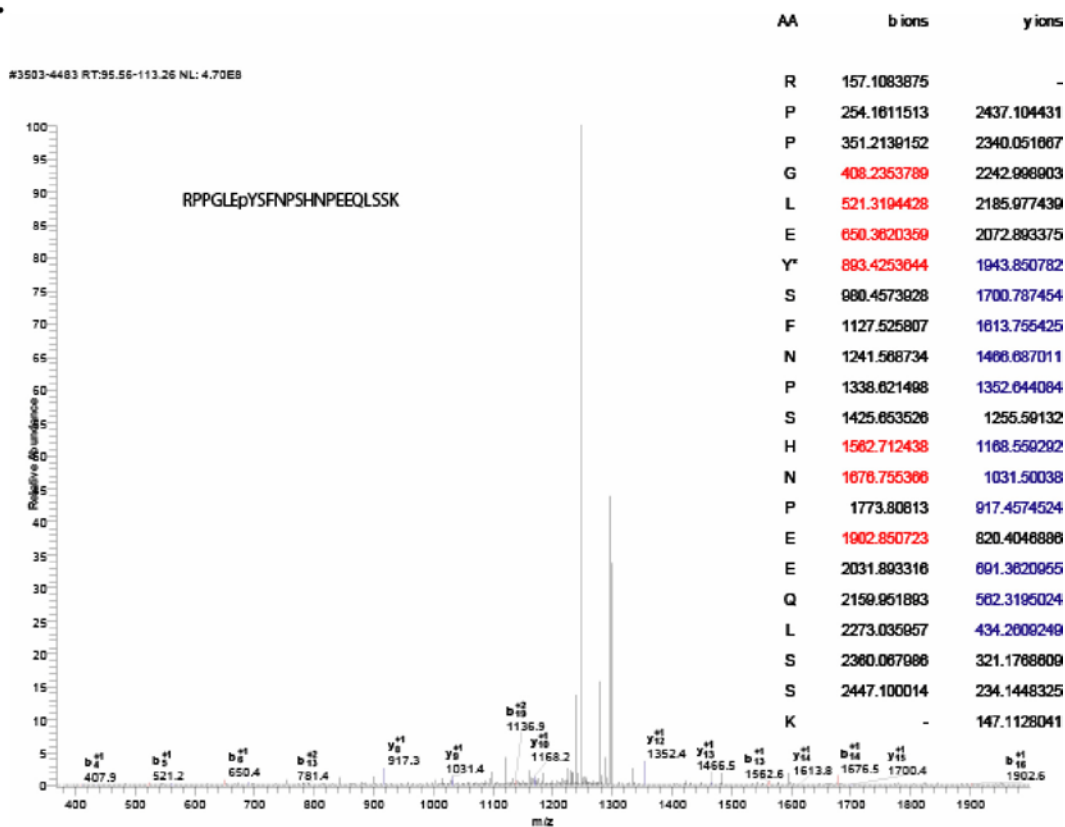

B.

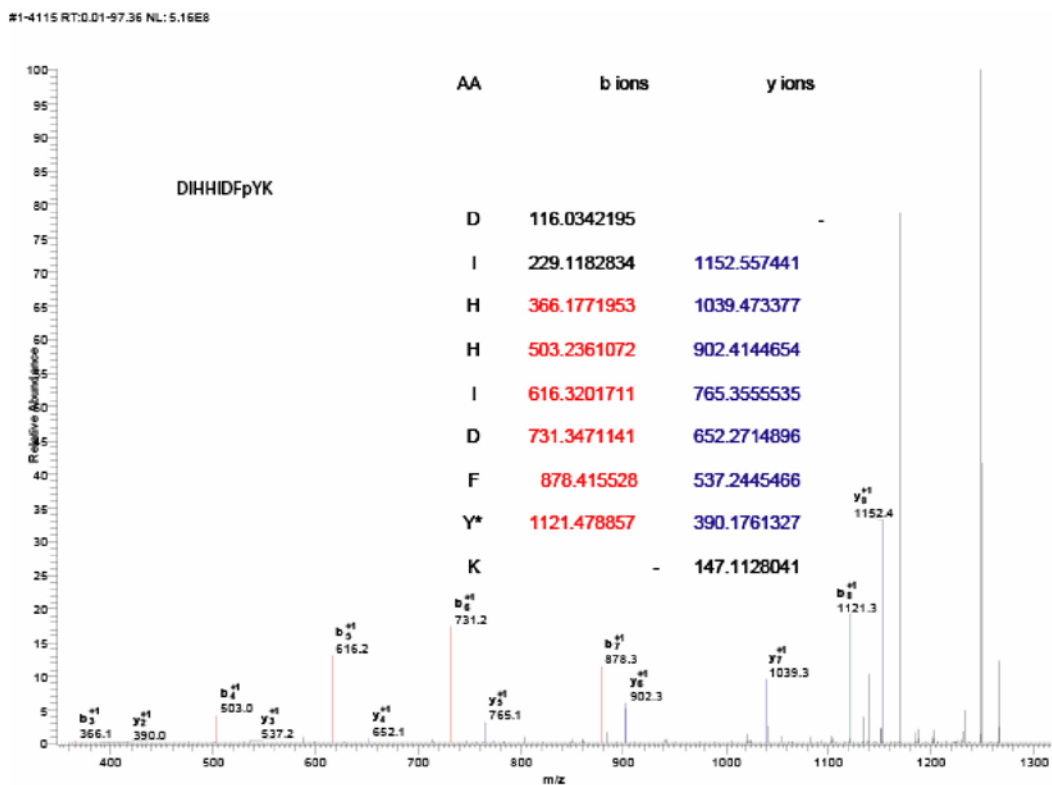

**Figure S2. Identification of Tyrosine Phosphorylation Sites of N546K Glioblastoma using ESI-MS and MS/MS.** The N546K mutant was analyzed by native-PAGE was subjected to in gel trypsin digestion. The resulting tryptic digest for each phosphorylation state was further analyzed by nano-LC (Dionex Ultimate3000 System) coupled to a Thermo ESI LTQ mass spectrometer. A typical gradient was run for 60 min from 0 to 100% solvent B (80% acetonitrile, 20% H<sub>2</sub>O and 0.1% formic acid). Solvent A consisted of 5% acetonitrile, 95% H<sub>2</sub>O, and 0.1% formic acid. The flow rate was set at 200 nL/min on a 75 μm x 10 cm fused silica capillary column (New Objectives) in-house packed with Michrom Magic C18AQ (200 Å, 5 μm). The ESI LTQ mass spectrometer was operated in selected ion monitoring mode (SIM) for precursor ions corresponding to the peptides containing unphosphorylated and phosphorylated tyrosine residues. The peptide identification was performed automatically using the Bioworks 3.1 software. The generated peptide list was ranked by XCorr to charge state ratio and the phosphorylation sites were identified for each phosphorylation state. Representative MS/MS spectra for the unphosphorylated tyrosine containing peptides for N546K glioblastoma mutant to determine the order of autophosphorylation are shown in **(A-B)**.

Figure S2

#7172-7172 RT:35.97-35.97 NL: 3.34E2

A.

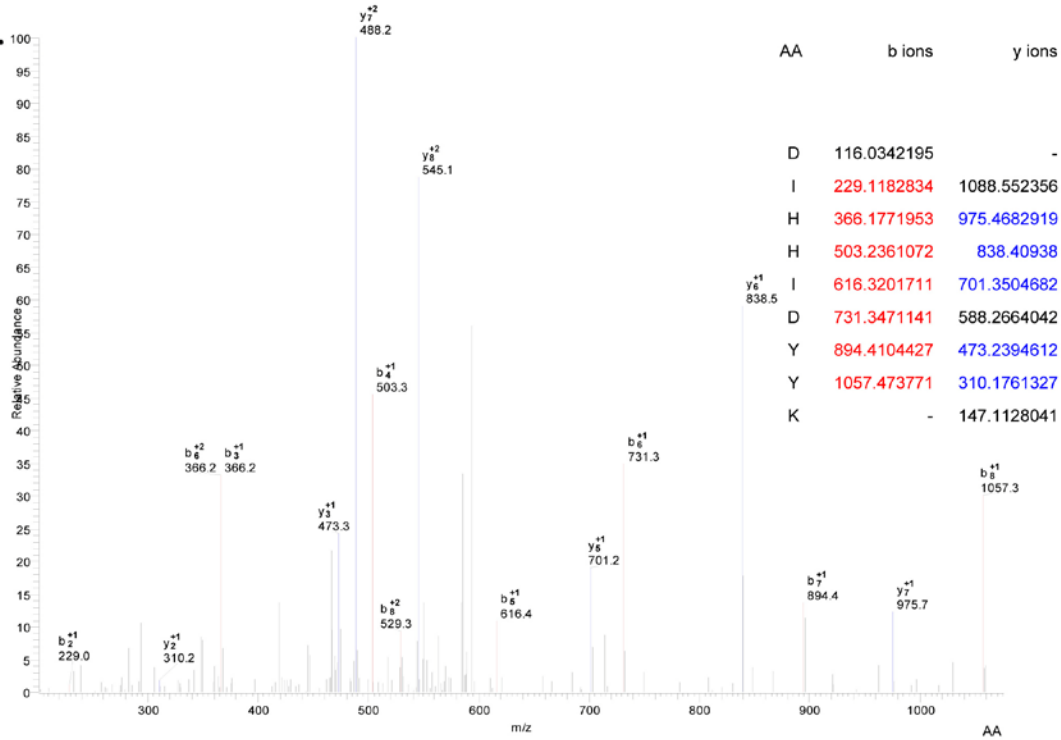

B.

#5378-5378 RT:25.91-25.91 NL: 3.94E4

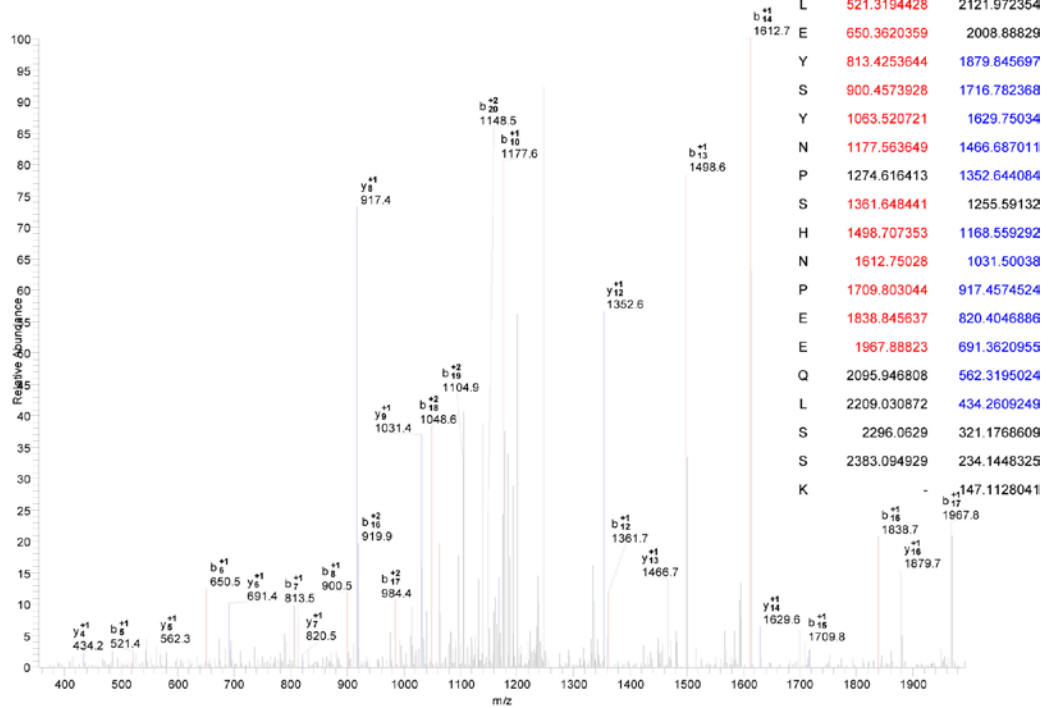

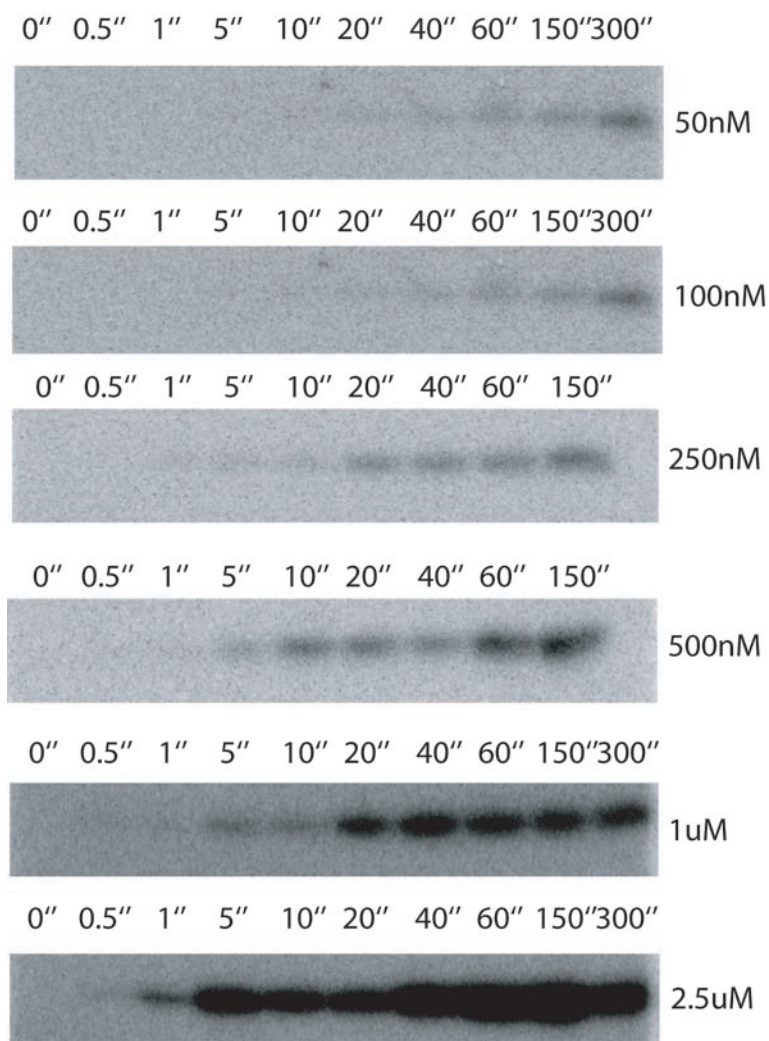

**Figure S3. Determination of  $K_M$  for FGFR1-mediated Substrate Phosphorylation.**

Phosphorylation of kinase-dead substrate ( $Y^{585}KD$ ) by fully activated kinase. FGFR1-3F-2P kinase ( $3 \mu M$ ) was incubated with  $50 \text{ nM}$ - $2.5 \mu M$   $Y^{583}KD$  substrate in the presence of  $1 \text{ mM}$  [ $\gamma$ - $^{32}P$ ]-ATP and  $2 \text{ mM}$   $MgCl_2$  in  $10 \text{ mM}$  HEPES, pH 7.4 in a rapid chemical quench apparatus at  $25^\circ C$ . The reaction was quenched at various times as indicated upon the addition of  $83 \text{ mM}$  EDTA, and the formation of the monophosphorylated species over time was followed by incorporation of radiolabeled phosphate. Reactions utilizing concentrations of substrate below  $50 \text{ nM}$  were below the limit of detection and could not be visualized on the gel.

A.

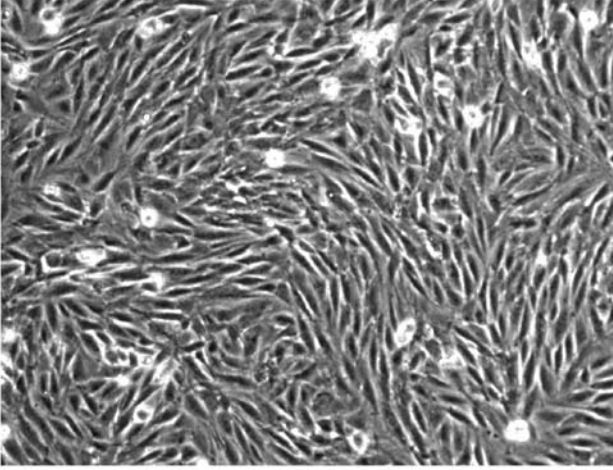

FGFR1\_WT

B.

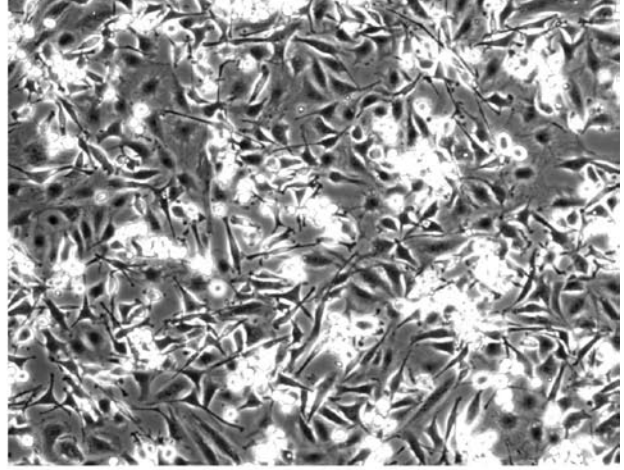

FGFR1\_N546K

**Figure S4. 3T3 Cells Stably Expressing Wild-Type or Mutant FGFR1.** 3T3 cells stably expressing either (A) a wild-type FGFR1 or (B) a glioblastoma-derived FGFR1\_N546K mutant.

| Reaction steps                                   | FGFR1K                            | FGFR1K_N546K |                      |
|--------------------------------------------------|-----------------------------------|--------------|----------------------|
|                                                  | KinTekSim Mechanism<br>Monophasic | Monophasic   | Biphasic             |
| Dimerization<br>$\text{mM}^{-1}\text{s}^{-1}$    | 400                               | 400          | NA                   |
| ATP binding<br>$\text{mM}^{-1}\text{s}^{-1}$     | 0.0175                            | 0.0175       | NA                   |
| $0\text{P} \rightarrow 1\text{P}, \text{s}^{-1}$ | 0.009                             | 0.09         | FP 0.25<br>SP 0.025  |
| $1\text{P} \rightarrow 2\text{P}, \text{s}^{-1}$ | 0.008                             | 0.05         | FP 0.045<br>SP 0.009 |
| $2\text{P} \rightarrow 3\text{P}, \text{s}^{-1}$ | 0.007                             | 0.04         | FP 0.015<br>SP 0.004 |
| $3\text{P} \rightarrow 4\text{P}, \text{s}^{-1}$ | 0.004                             | ND           | ND                   |
| $4\text{P} \rightarrow 5\text{P}, \text{s}^{-1}$ | 0.003                             | ND           | ND                   |
| $5\text{P} \rightarrow 6\text{P}, \text{s}^{-1}$ | -                                 | -            | -                    |

**Table S1. Comparison of Autophosphorylation Kinetics of FGFR1 Kinase (WT) and FGFR1 Kinase Mutant Implicated in Glioblastoma, N546K.** Abbreviations: NA: not applicable, FGFR1K dimerization and ATP binding were not included in the biphasic mechanism used for kinetic simulation; FP: fast phase in the biphasic mechanism; SP: slow phase in the biphasic mechanism; ND: not determined, the additional kinetic steps required to describe the biphasic behavior limited the number of phosphorylation events used for kinetic simulation
